# Supplementary material for: Polymorphism, structural characterisation and electrical properties of Na2Nb4O11
Source: Royal Society of Chemistry journal article supplement (doi:10.1039/c1jm11848j), 2011-01-01
Supplement: c1jm11848j.pdf [file c1jm11848j.pdf]

# Polymorphism, structural characterisation and electrical properties of $\text{Na}_2\text{Nb}_4\text{O}_{11}$

Nahum Masó, David I. Woodward, Alejandro Várez and Anthony R. West

## Electronic Supplementary Information

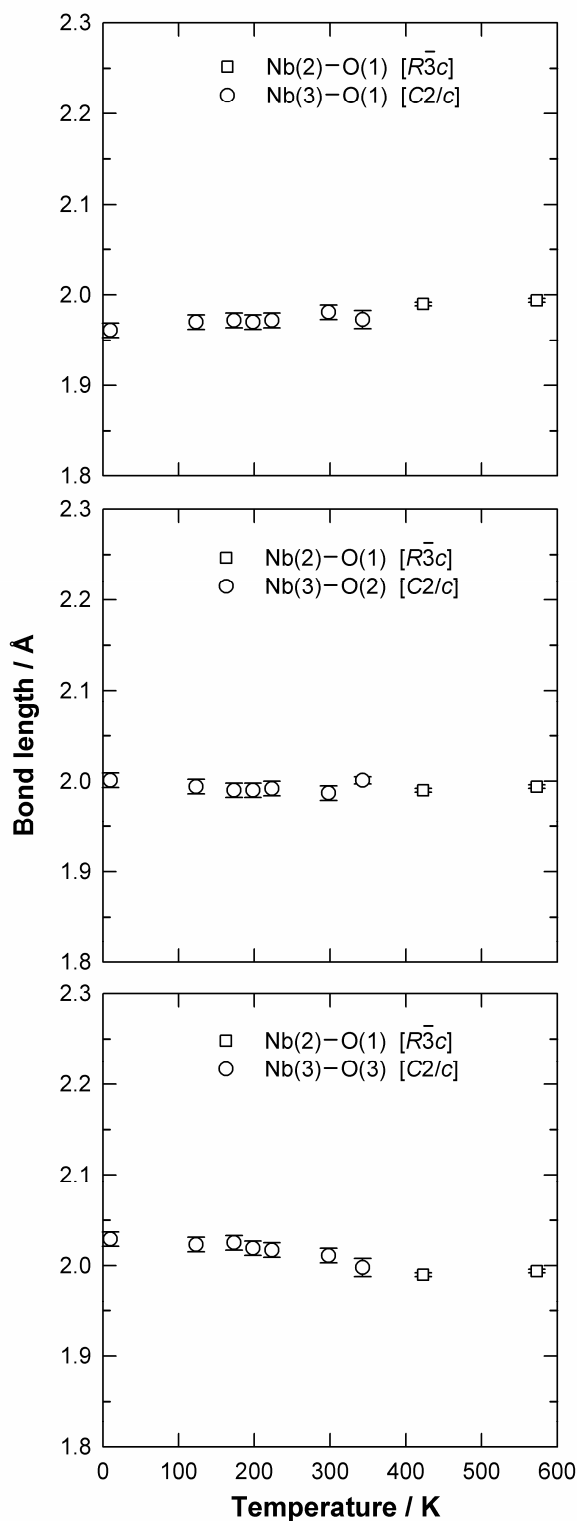

**Fig S1.** Nb-O bond lengths vs temperature for  $\text{NbO}_6$  octahedra. Error bars represent  $2\sigma$ . Atoms in  $R\bar{3}c$  split in  $C2/c$  as follows: Na(1)  $\rightarrow$  Na(1), Nb(1)  $\rightarrow$  Nb(1,2), Nb(2)  $\rightarrow$  Nb(3), O(1)  $\rightarrow$  O(1,2,3), O(2)  $\rightarrow$  O(4,6) and O(3)  $\rightarrow$  O(5).

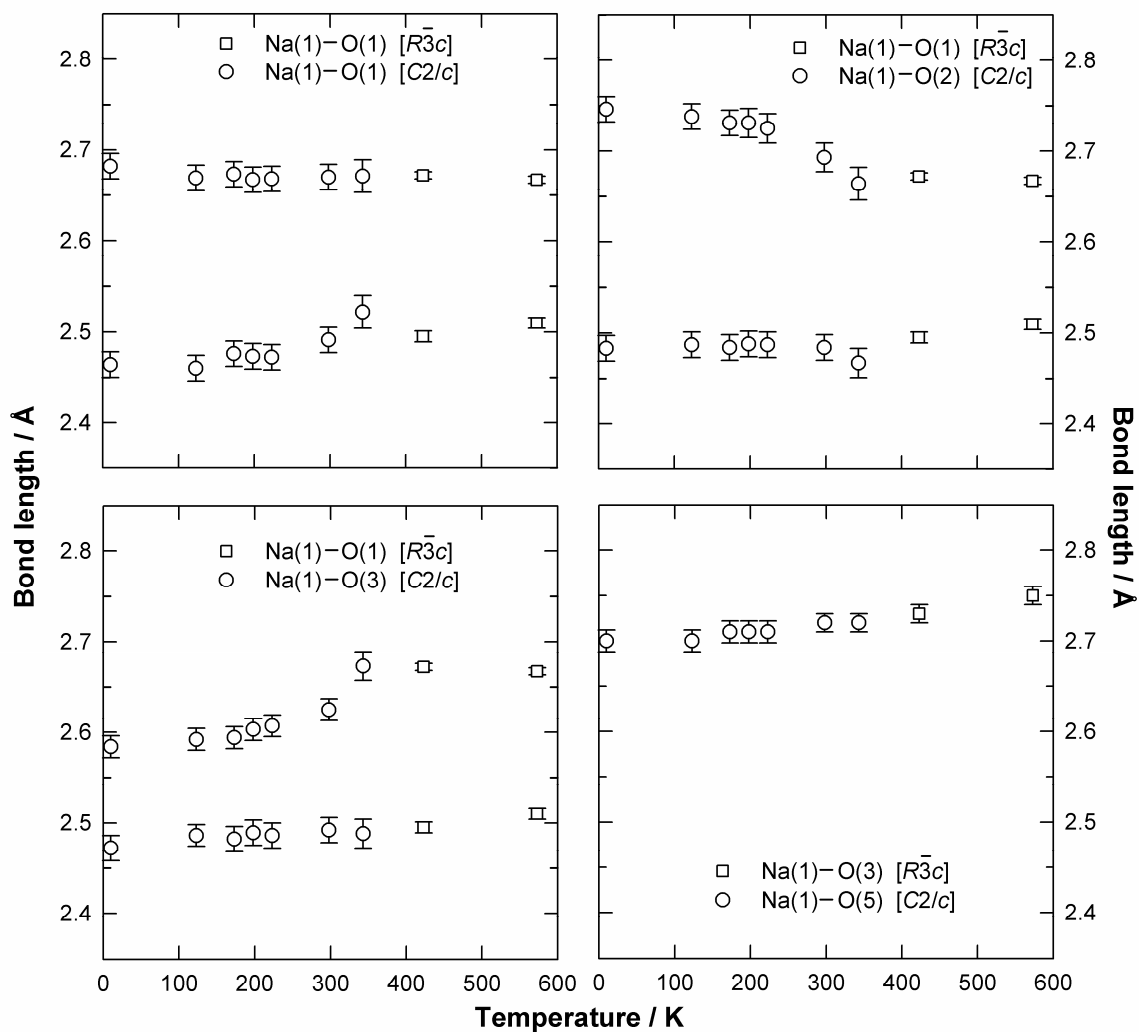

**Fig S2.** Na-O bond lengths vs temperature for NaO<sub>7</sub> polyhedra. Error bars represent 2 $\sigma$ . Atoms in  $R\bar{3}c$  split in  $C2/c$  as follows: Na(1)  $\rightarrow$  Na(1), Nb(1)  $\rightarrow$  Nb(1,2), Nb(2)  $\rightarrow$  Nb(3), O(1)  $\rightarrow$  O(1,2,3), O(2)  $\rightarrow$  O(4,6) and O(3)  $\rightarrow$  O(5).

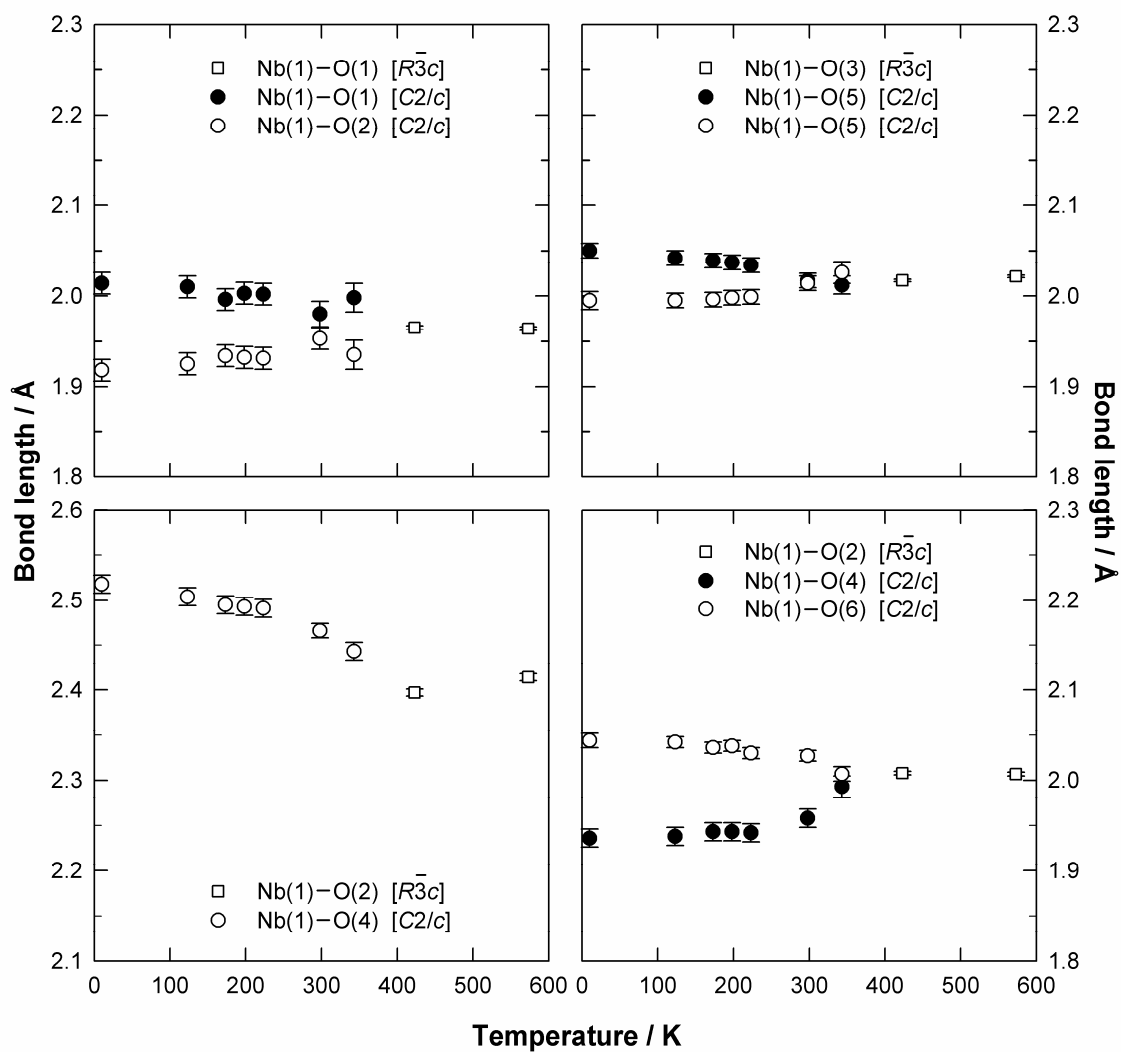

**Fig S3.** Nb-O bond lengths vs temperature for NbO<sub>7</sub> pentagonal bipyramids. Error bars represent 2σ. Atoms in *R*-3*c* split in *C*2/*c* as follows: Na(1) → Na(1), Nb(1) → Nb(1,2), Nb(2) → Nb(3), O(1) → O(1,2,3), O(2) → O(4,6) and O(3) → O(5).

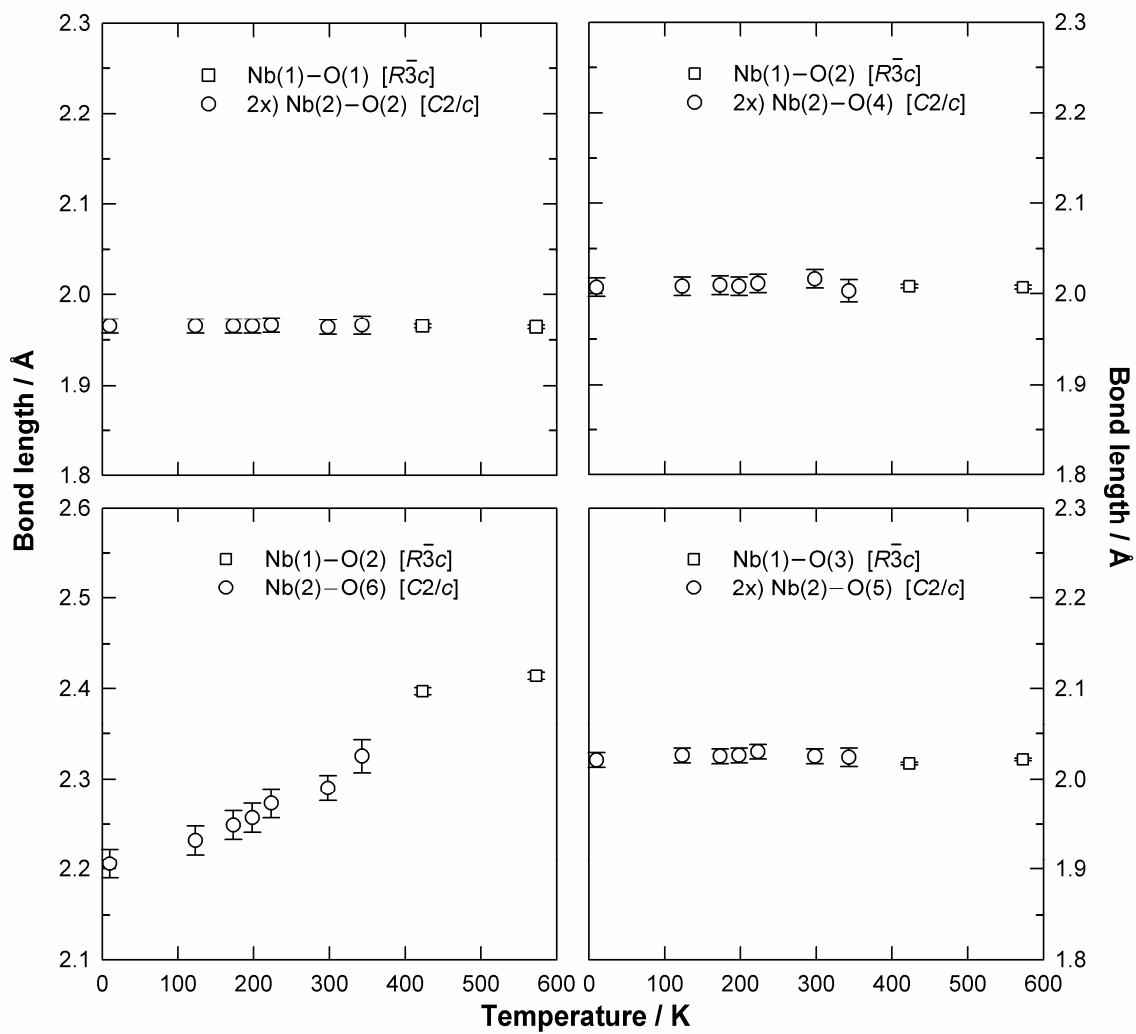

Fig S3. Continued.
